# Supplementary material for: A Comparative Investigation of the Surface Properties of Corn-Starch-Microfibrillated Cellulose Composite Films
Source: MDPI journal article supplement (doi:10.3390/ma16093320), 2023-04-23
Supplement: s1 [file s1]

# Supplementary Materials

## A Comparative Investigation of the Surface Properties of Corn Starch-Microfibrillated Cellulose Composite Films

**Zuzanna Żołek-Tryznowska <sup>1,\*</sup>, Ewa Bednarczyk <sup>1</sup>, Mariusz Tryznowski <sup>1</sup> and Tomasz Kobiela <sup>2</sup>**

<sup>1</sup> Faculty of Mechanical and Industrial Engineering, Warsaw University of Technology, Narbutta 85, 02-524, Warsaw, Poland

<sup>2</sup> Faculty of Chemistry, Warsaw University of Technology, Noakowskiego 3, Warsaw, 00-662, Poland

\* Correspondence: Zuzanna.Tryznowska@pw.edu.pl;

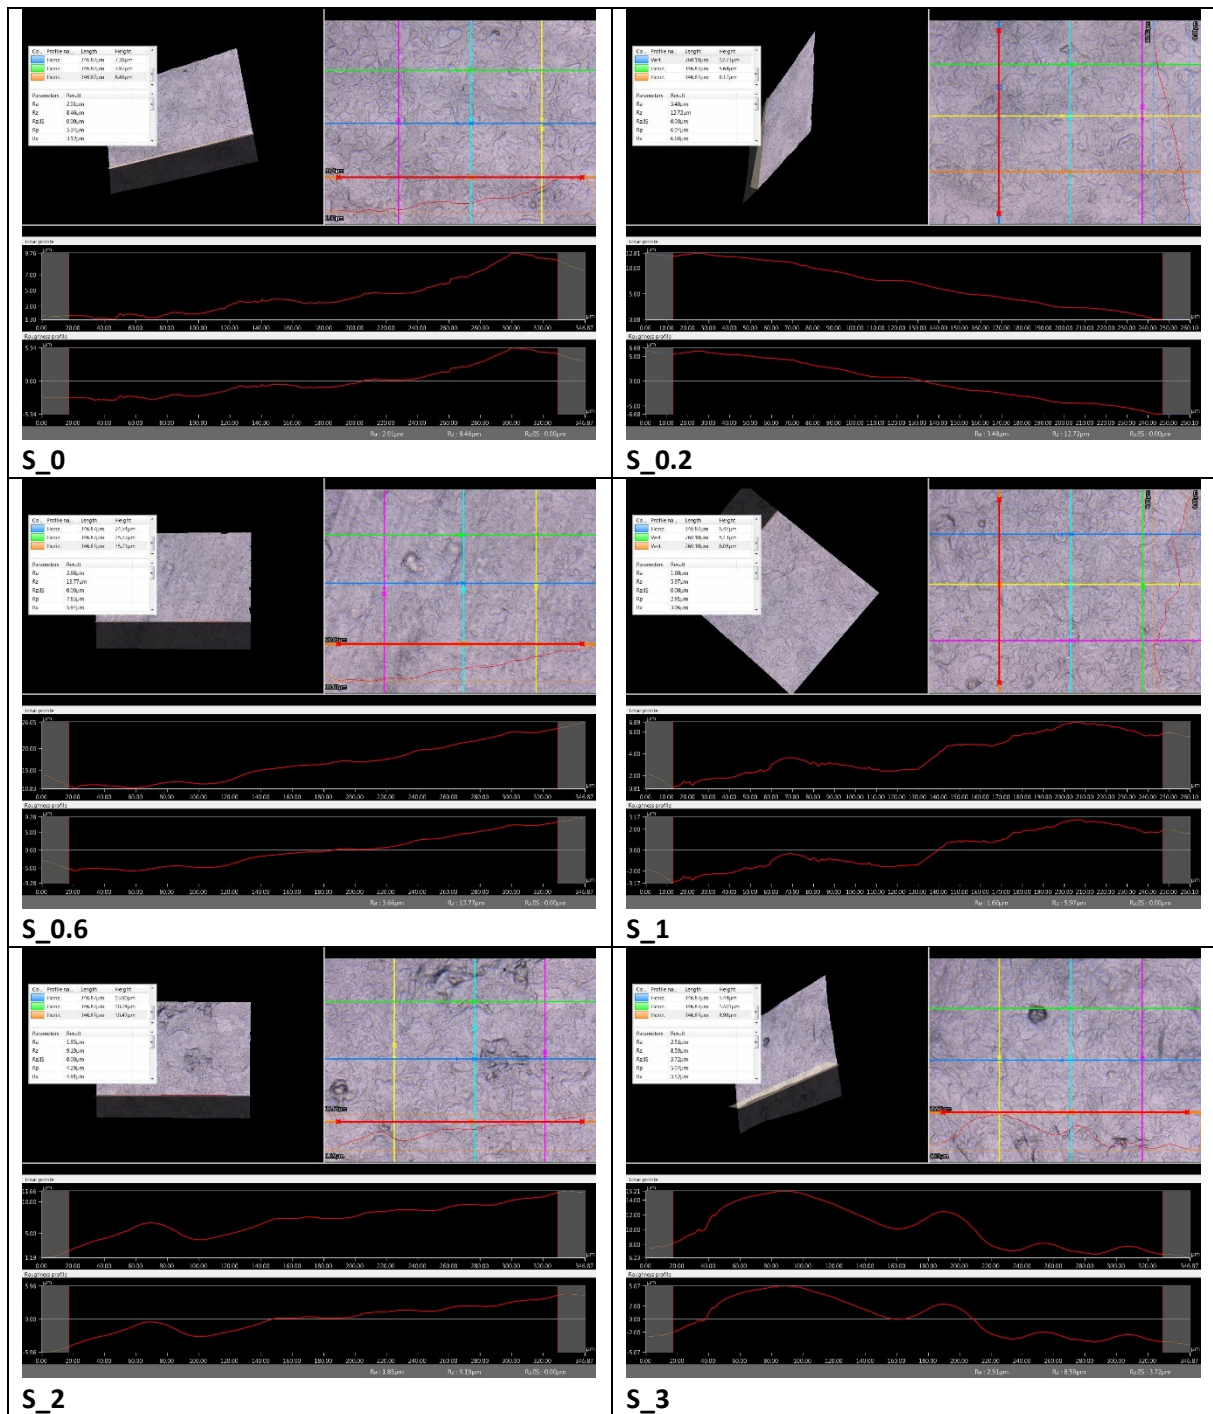

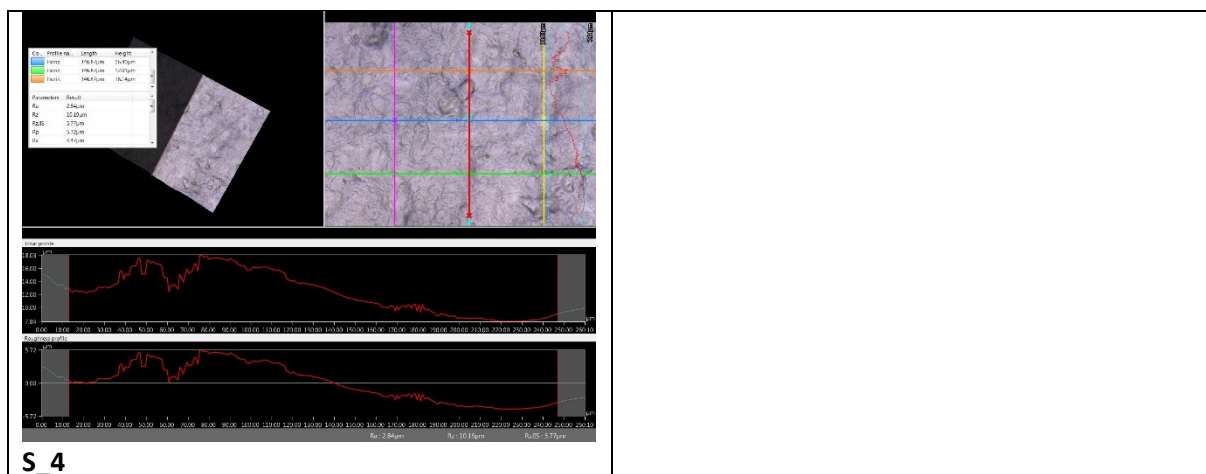

**Figure S1:** Images of microscopic observation of developed film surface obtained with optical microscope.

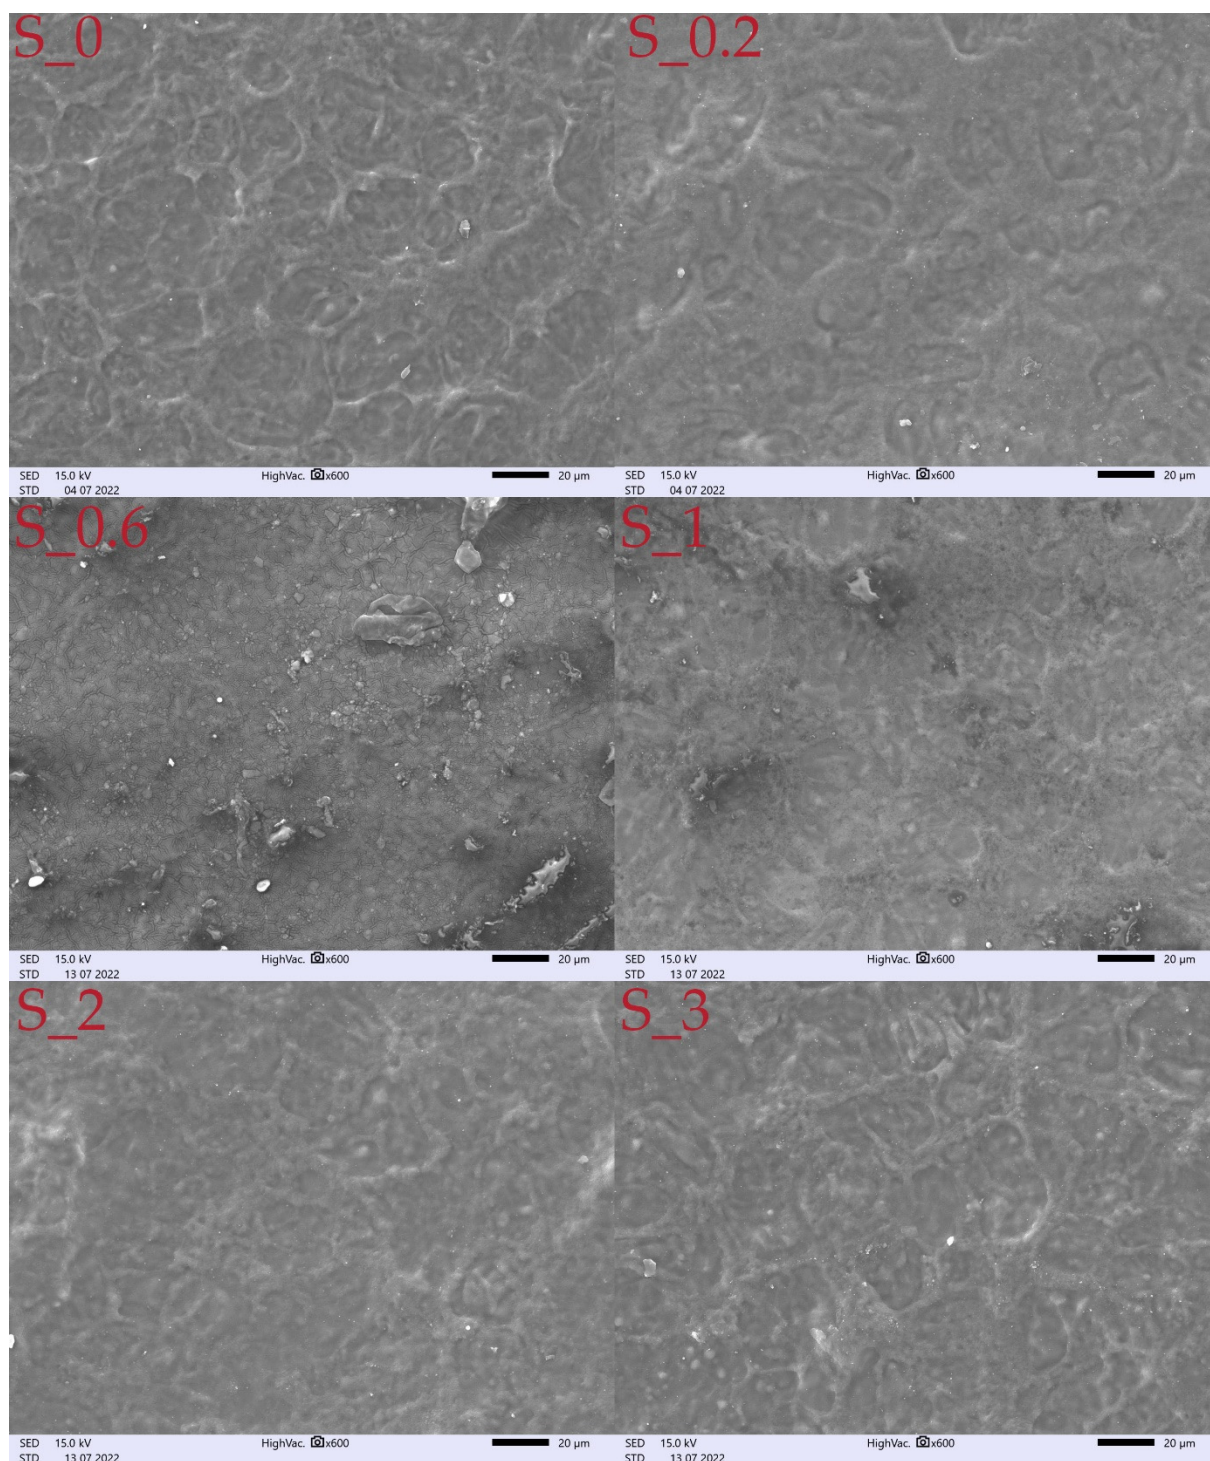

**Figure S2:** SEM images of surface at a magnification of 600x.
